# Supplementary material
Source: PubMed Central journal article supplement (PMC4524063)
Supplement: JVI.01331-15_zjv999090724so1.pdf [file JVI.01331-15_zjv999090724so1.pdf]

**Table S1. Sequences of the primers and Oligos**

| Primers and Oligos                        | Sequences (5' to 3')                                                  | Purpose                                             |
|-------------------------------------------|-----------------------------------------------------------------------|-----------------------------------------------------|
| siGFP                                     |                                                                       | Chemical synthesis of                               |
| Homologous sequence                       | GCAAGCTGACCCTGAAGTTC                                                  | siRNA or                                            |
| Sense strand                              | GCAAGCUGACCCUGAAGUUCUU                                                | oligonucleotides for                                |
| Antisense strand                          | UUCGUUCGACUGGGACUUCAAG                                                | shRNA construction                                  |
| shGFP                                     |                                                                       | that induced RNAi                                   |
| Homologous sequence                       | GCAAGCTGACCCTGAAGTTC                                                  |                                                     |
| Sense strand                              | GATCCCCGCAAGCTGACCCTGAAGTTCTTCAAGAGAGAACTTC<br>AGGGTCAGCTTGCTTTTAA    |                                                     |
| Antisense strand                          | AGCTTAAAAAGCAAGCTGACCCTGAAGTTCTCTCTTGAAGAAC<br>TTCAGGGTCAGCTTGCGGG    |                                                     |
| shLuc                                     |                                                                       |                                                     |
| Homologous sequence                       | CCGCTGGAGAGCAACTGCA                                                   |                                                     |
| Sense strand                              | GATCCCCCGCTGGAGAGCAACTGCATTCAAGAGATGCAGTTG<br>CTCTCCAGCGGTTTTTAA      |                                                     |
| Antisense strand                          | AGCTTAAAAACCGCTGGAGAGCAACTGCATCTCTTGAATGCAG<br>TTGCTCTCCAGCGGGGG      |                                                     |
| Anti-eGFP-mRNA<br>(Used in HEK293T)       |                                                                       | Construction of in                                  |
| 1 to 500 bp-For                           | ATGGTGAGCAAGGGCGA                                                     | vitro- transcription                                |
| 1 to 500 bp-Rev                           | <i>TAATACGACTCACTATAGGGCTTGTACAGCTCGTCCATGCC</i>                      | templates for                                       |
| Anti-eGFP-mRNA<br>(used in Drosophila S2) |                                                                       | preparing probes,                                   |
| 501 to 720 bp-For                         | 5' <i>GATCCGCCACAACATCGAGGACGGC</i>                                   | dsRNA and ssRNA                                     |
| 501 to 720 bp-Rev                         | 5' <i>TAATACGACTCACTATAGGGCTTGTACAGCTCGTCCATGCC</i>                   |                                                     |
| Anti-antisense siGFP                      |                                                                       |                                                     |
| Sense strand                              | 5' <i>TAATACGACTCACTATAGGGGCAAGCTGACCCTGAAGTTCTT</i>                  |                                                     |
| Antisense strand                          | 5' <i>AAGAACTTCAGGGTCAGCTTGCCCCCTATAGTGAGTCGTATTA</i>                 |                                                     |
| 1-244 bp-dsRNA For                        | <i>TAATACGACTCACTATAGGGATGGTGAGCTAGGGCGAGGA</i>                       |                                                     |
| 1-244 bp-dsRNA Rev                        | <i>TAATACGACTCACTATAGGGGCTGCTTCATGTGGTCGG</i>                         |                                                     |
| 1-500 bp-dsRNA For                        | <i>TAATACGACTCACTATAGGGATGGTGAGCTAGGGCGAGGA</i>                       |                                                     |
| 1-500 bp-dsRNA Rev                        | <i>TAATACGACTCACTATAGGGTTGAAGTTCACCTTGATGCC</i>                       |                                                     |
| 1-500 bp-ssRNA For                        | <i>TAATACGACTCACTATAGGGATGGTGAGCTAGGGCGAGGA</i>                       |                                                     |
| 1-500 bp-ssRNA Rev                        | TTGAAGTTCACCTTGATGCCGT                                                |                                                     |
| 5'-HEX labeled siRNA                      | with HEX label at the 5' terminal of eGFP specific siRNA sense strand | Chemical synthesis of<br>labeled siRNA<br>substrate |

The GenBank accession number of the eGFP protein used in the current study is U55763. The T7 polymerase promoter is shown in italics. The eGFP ORF region is amplified from pEGFP-C1.

**Table S2. List of primer sequences**

| <b>Primer</b>       | <b>Sequences (5' to 3')</b>                                        |
|---------------------|--------------------------------------------------------------------|
| pAcV5HisB-N For     | <u>GGAATTCGCCACCATGTCTGATAATGGACCCCAATC</u> (EcoRI)                |
| pAcV5HisB-N Rev     | ATAAGAAT <u>GCGGCCGCCTGCCTGCCTGAGTTGAATCAGCAG</u> (NotI)           |
| pAcV5HisB-Nsp14 For | ATAAGAAT <u>GCGGCCGC</u> GCCACCATGGCAGAAAATGTAAGTGGACTTTTAA (NotI) |
| pAcV5HisB-Nsp14 Rev | <u>CCGCTCGAGCGCTGTAACCTGGTAAATGTATTCCAC</u> (XhoII)                |
| pAcV5HisB-ORF6 For  | <u>GGAATTCGCCACCATGTTCCACCTGGTGGACTTCCAGG</u> (EcoRI)              |
| pAcV5HisB-ORF6 Rev  | ATAAGAAT <u>GCGGCCGC</u> CGGGGTAGTCCAGCTCCATGGGCTCC (NotI)         |
| pGEX6p-1-N For      | <u>CGCGGATCCATGTCTGATAATGGACCCCAATC</u> (BamHI)                    |
| pGEX6p-1-N Rev      | ATAAGAAT <u>GCGGCCGC</u> TGCCTGAGTTGAATCAGCAG (NotI)               |
| N-R186A For*        | AGTCAAGCCTCTTCTGCCTCCTCA                                           |
| N-R186A Rev*        | ACTACGTGATGAGGAGGCAGAAGA                                           |
| N-R190/192A For*    | TCTCGCTCCTCATCAGCTAGTGCCGTAATTCA                                   |
| N-R190/192A Rev*    | TGAATTACCGGCACTAGCTGATGAGGAGCGAGA                                  |
| N-R196A For*        | AGTCGCGTAATTCAGCAAATTCAACTCCT                                      |
| N-R196A Rev*        | AGGAGTTGAATTGCTGAATTACCGCGACT                                      |
| N-R204 For*         | ACTCCTGGCAGCAGTGCGGGAAAT                                           |
| N-R204 Rev*         | AGCAGGAGAATTTCCCGCACTGCT                                           |
| N-R210 For*         | GGAAATTCTCCTGCTGCAATGGCT                                           |
| N-R210 Rev*         | ACCTCCGCTAGCCATGCAGCAGG                                            |
| N-R227 For*         | CTATTGCTGCTAGACGCATTGAAC                                           |
| N-R227 Rev*         | CTCAAGCTGGTTCAATGCGTCTAG                                           |
| N-K249250A For*     | GGCCAAACTGTCACTGCGGCATCTGCTGCTG                                    |
| N-K249250A Rev*     | TGCCTCAGCAGCAGATGCCGCAGTGACAGTT                                    |
| N-K257258A For*     | GCTGCTGAGGCATCTGCAGCGCCTCGCCAAA                                    |
| N-K257258A Rev*     | ACGTTTTTGGCGAGGCGCTGCAGATGCCTCA                                    |
| N-R260A For*        | GCATCTAAAAAGCCTGCCAAAAACGTA                                        |
| N-R260A Rev*        | GGCAGTACGTTTTTGGCAGGCTTTTTAGATGC                                   |
| N-K262R263A For*    | AAAAAGCCTCGCCAAGCAGCTACTGCCACAA                                    |
| N-K262R263A Rev*    | CTGTTTTGTGGCAGTAGCTGCTTGGCGAGGC                                    |
| N-K267A For*        | AAACGTAAGTCCACAGCACAGTACAACG                                       |
| N-K267A Rev*        | AGTGACGTTGTACTGTGCTGTGGCAGTA                                       |
| N-K277278A For*     | ACTCAAGCATTTGGGGCAGCTGGTCCAGAAC                                    |
| N-K277278A Rev*     | GGTTTGTCTGGACCAGCTGCCCAAATGCT                                      |
| N-K257A For*        | GCTGCTGAGGCATCTGCAAAGCCTCGCCAAA                                    |
| N-K257A Rev*        | ACGTTTTTGGCGAGGCTTTCAGATGCCTCA                                     |
| N-K258A For*        | GCTGCTGAGGCATCTAAAGCGCCTCGCCAAA                                    |
| N-K258A Rev*        | ACGTTTTTGGCGAGGCGCTTTCAGATGCCTCA                                   |
| N-K262A For*        | AAAAAGCCTCGCCAAGCAGTACTGCCACAA                                     |
| N-K262A Rev*        | CTGTTTTGTGGCAGTACGTGCTTGGCGAGGC                                    |

|              |                                           |
|--------------|-------------------------------------------|
| N-R263A For* | AAAAAGCCTCGCCAAA <i>AAAGCT</i> ACTGCCACAA |
| N-R263A Rev* | CTGTTTTGTGGCAGT <i>AGCTTTTT</i> GGCGAGGC  |

The GenBank accession number of the N protein used in the current study is SARS-CoV (NC\_004718). Primers with asterisks are designed for site-directed mutagenesis. Underlined characters indicate restriction endonuclease sites, and substituted nucleotides for mutagenesis are shown in *Italics*.

**Table S3. Sequences of primers for real-time PCR and siRNAs for Dicer1/Ago2 knockdown**

| Primer                    | Sequences (5' to 3')     | Purpose                                                                    |
|---------------------------|--------------------------|----------------------------------------------------------------------------|
| RT-Mouse Dicer1 For       | TGTTTGACCATCCAGACGCAGAG  | Primer sequences for real-time PCR                                         |
| RT-Mouse Dicer1 Rev       | GGTGTTATTGACAAGGGCAGAGC  |                                                                            |
| RT-Mouse Ago2 For         | CCCACCTCCCGTGTTTACAAGTC  | Homologous sequences for Dicer1 and AGO2 knockdown in mouse Neuro-2a cells |
| RT-mouse Ago2 Rev         | CGCCCAGTCACATCTGTCATCTC  |                                                                            |
| RT-MHV mRNA7 For          | TATAAGAGTGATTGGCGTCC     |                                                                            |
| RT-MHV mRNA7 Rev          | GAGTAATGGGGAACCACT       |                                                                            |
| RT-Mouse IFN- $\beta$ For | CCGAGCAGAGATCTTCAGGAA    |                                                                            |
| RT-Mouse IFN- $\beta$ Rev | CCTGCAACCACCACTCATTCT    |                                                                            |
| RT-Mouse ISG56 For        | CAGTCAGAAGACAAGGCAATCAC  |                                                                            |
| RT-Mouse ISG56 Rev        | TTTCAGTTTGTAGACTAGCCCAAG |                                                                            |
| RT-Mouse GAPDH For        | AGTGTTTCCTCGTCCCGTAG     |                                                                            |
| RT-Mouse GAPDH Rev        | CTGTGCCGTTGAATTTGC       |                                                                            |
| siDicer1-1                | ATCGATCATATGTCCAGTCTA    |                                                                            |
| siDicer1-2                | AACGGATCTTACAGCAATTAA    |                                                                            |
| siDicer1-3                | CACCATATCCATCGAGCTGAA    |                                                                            |
| siDicer1-6                | CAGGAGGAGGTACTIONTAGGAAA |                                                                            |
| siAgo2-1                  | CACGTTTCATCGTGGTGCAGAA   |                                                                            |
| siAgo2-2                  | CACTATGAATTGGACATCAA     |                                                                            |
| siAgo2-3                  | AAGGGTAAAGTTTACCAAAGA    |                                                                            |
| siAgo2-4                  | CACCACCGGGAGAACAATCAA    |                                                                            |

The GenBank accession number of the proteins used in the current study is Mouse Dicer1 (NM\_148948.2); Mouse Ago2 (NM\_153178.4); MHV mRNA7 (NC\_001846); Mouse IFN- $\beta$  (NM\_010510.1); Mouse ISG56 (NM\_008331.3); Mouse GAPDH (GU214026). Primers for mRNA7 detection target the ORF N and the coterminal 3'UTR.
